# Supplementary figures and images for: Efficacy of Mesenchymal-Stromal-Cell-Derived Extracellular Vesicles in Ameliorating Cisplatin Nephrotoxicity, as Modeled Using Three-Dimensional, Gravity-Driven, Two-Layer Tubule-on-a-Chip (3D-MOTIVE Chip)
Source: MDPI journal article supplement (doi:10.3390/ijms242115726), 2023-10-29

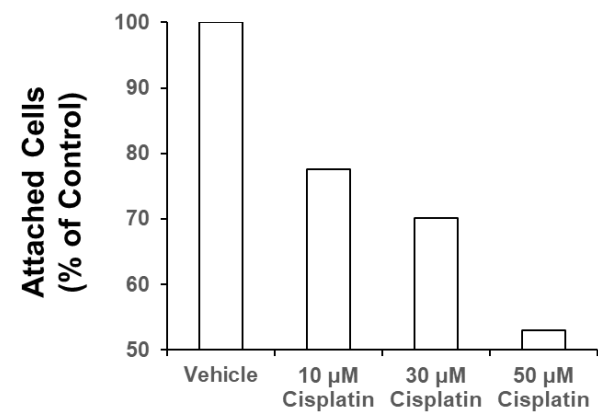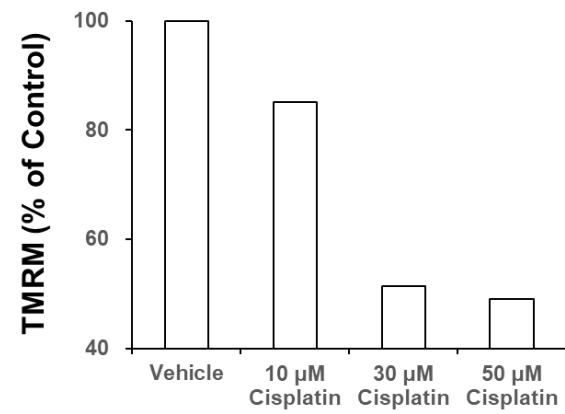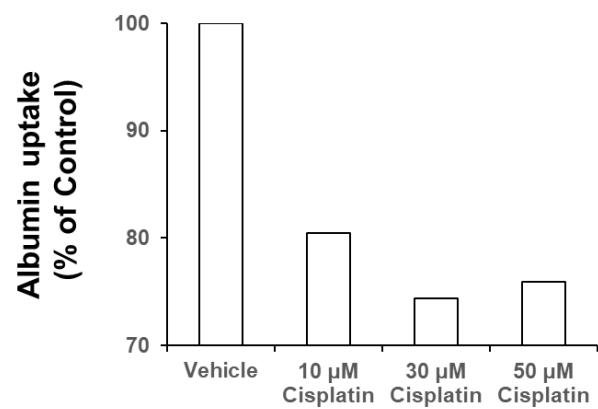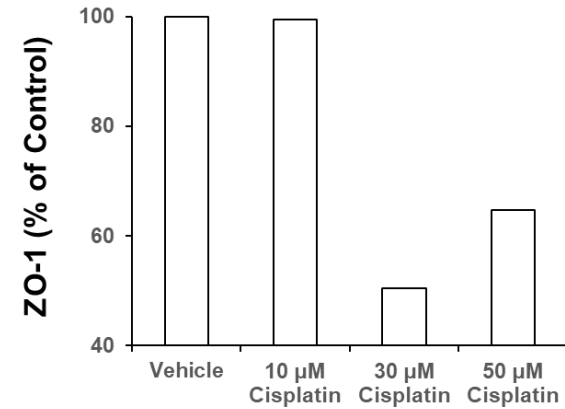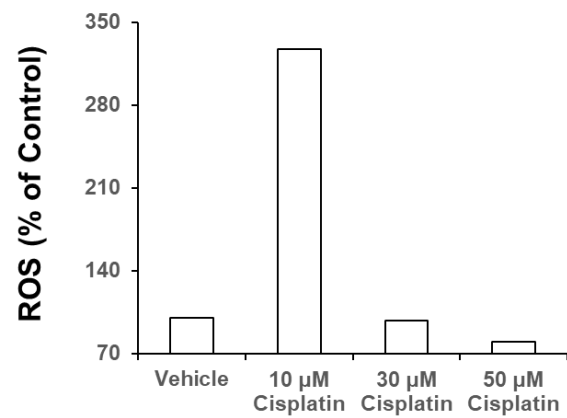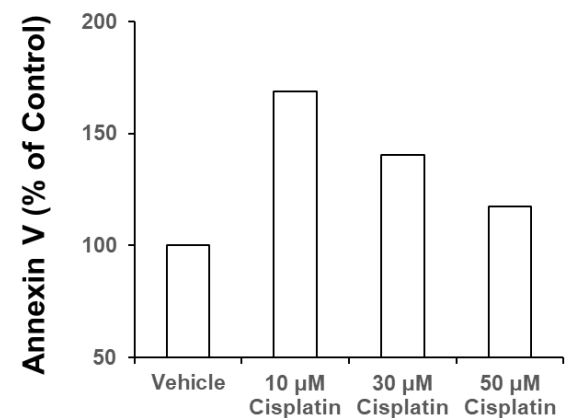

Supplement: s1 [file s1]
